# Supplementary material for: Blank variability in coulometric measurements of dissolved inorganic carbon
Source: Copernicus journal article supplement (doi:10.5194/os-21-3123-2025), 2025-11-26
Supplement: Supplementary file 1 [file coulometer-blank-supplement.pdf › supplement/coulometer-blank-supplement.pdf]

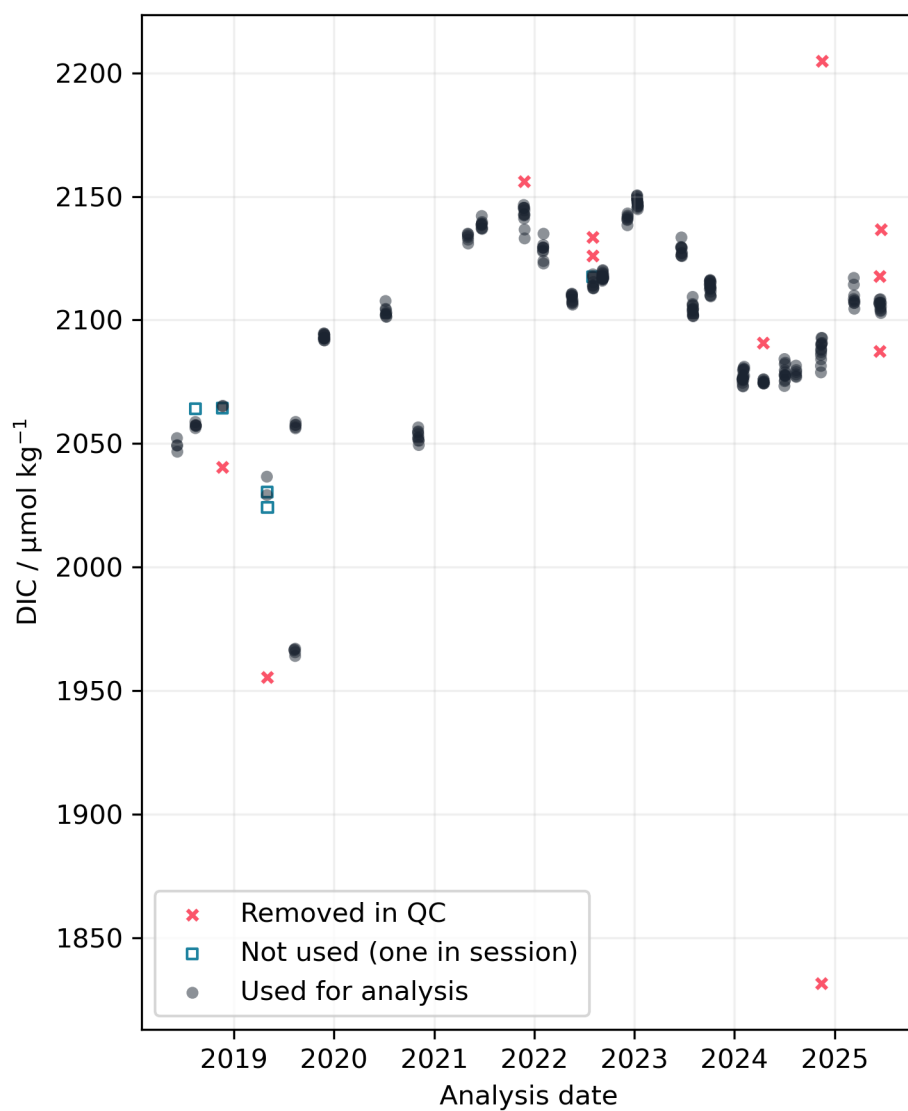

Supplementary Figure S1. Changes in calibrated DIC of the laboratory internal standard used as the test dataset throughout the analysis period, showing points that were removed in QC (red crosses) or not used because there remained only one measurement of the internal standard in the corresponding analysis session (blue squares).
