# Supplementary material for: Blank variability in coulometric measurements of dissolved inorganic carbon
Source: Copernicus journal article supplement (doi:10.5194/os-21-3123-2025), 2025-11-26
Supplement: Supplementary file [file os-21-3123-2025-supplement-title-page.pdf › os-21-3123-2025-supplement-title-page.pdf]

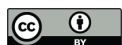

## *Supplement of*

# **Blank variability in coulometric measurements of dissolved inorganic carbon**

**Matthew P. Humphreys and Sharyn Ossebaar**

*Correspondence to:* Matthew P. Humphreys (matthew.humphreys@nioz.nl)

- os-21-3123-2025-supplement-title-page.pdf
- supplement
  - .DS\_Store
  - coulometer-blank-supplement.pdf
  - plot\_sessions\_all
    - \* .DS\_Store
    - \* psa\_C\_Apr15-24\_0804.png
    - \* psa\_C\_Apr16-24\_0804.png
    - \* psa\_C\_Apr17-24\_0804.png
    - \* psa\_C\_Aug01-23\_0808.png
    - \* psa\_C\_Aug02-22\_0708.png
    - \* psa\_C\_Aug02-23\_0808.png
    - \* psa\_C\_Aug03-22\_0808.png
    - \* psa\_C\_Aug03-23\_0808.png
    - \* psa\_C\_Aug04-22\_0808.png
    - \* psa\_C\_Aug09-19\_0708.png
    - \* psa\_C\_Aug12-19\_0708.png
    - \* psa\_C\_Aug12-24\_0808.png
    - \* psa\_C\_Aug13-18\_1008.png
    - \* psa\_C\_Aug13-19\_0708.png
    - \* psa\_C\_Aug13-24\_0808.png
    - \* psa\_C\_Aug14-18\_1308.png
    - \* psa\_C\_Aug14-19\_0708.png
    - \* psa\_C\_Aug15-18\_0708.png
    - \* psa\_C\_Dec06-22\_0812.png
    - \* psa\_C\_Dec07-22\_0912.png
    - \* psa\_C\_Feb01-22\_0802.png

- \* psa\_C\_Feb01-24\_0802.png
- \* psa\_C\_Feb02-22\_0802.png
- \* psa\_C\_Feb02-24\_0802.png
- \* psa\_C\_Feb03-22\_0802.png
- \* psa\_C\_Feb05-24\_0802.png
- \* psa\_C\_Jan10-23\_0801.png
- \* psa\_C\_Jan11-23\_0801-a.png
- \* psa\_C\_Jan12-23\_0701.png
- \* psa\_C\_Jan13-23\_0801.png
- \* psa\_C\_Jan30-24\_0801.png
- \* psa\_C\_Jan31-24\_0801.png
- \* psa\_C\_Jul01-24\_0807.png
- \* psa\_C\_Jul02-24\_0807.png
- \* psa\_C\_Jul03-24\_0807.png
- \* psa\_C\_Jul04-24\_0807.png
- \* psa\_C\_Jul07-20\_0707.png
- \* psa\_C\_Jul08-20\_0707.png
- \* psa\_C\_Jul09-20\_0707.png
- \* psa\_C\_Jul10-20\_0707.png
- \* psa\_C\_Jun07-18\_0706.png
- \* psa\_C\_Jun08-18\_0706.png
- \* psa\_C\_Jun12-25\_0906.png
- \* psa\_C\_Jun13-25\_0806.png
- \* psa\_C\_Jun16-25\_0806.png
- \* psa\_C\_Jun17-25\_0806.png
- \* psa\_C\_Jun18-25\_0806.png
- \* psa\_C\_Jun20-23\_1106.png
- \* psa\_C\_Jun21-23\_0806.png
- \* psa\_C\_Jun22-21\_0806.png
- \* psa\_C\_Jun22-23\_0706.png
- \* psa\_C\_Jun23-21\_0706.png
- \* psa\_C\_Jun23-23\_0806.png
- \* psa\_C\_Jun24-21\_0806.png
- \* psa\_C\_Mar11-25\_0803.png
- \* psa\_C\_Mar12-25\_0803.png
- \* psa\_C\_Mar13-25\_0803.png
- \* psa\_C\_May01-19\_0805.png
- \* psa\_C\_May03-21\_0705.png
- \* psa\_C\_May04-21\_0705.png
- \* psa\_C\_May17-22\_0705.png
- \* psa\_C\_May18-22\_0705.png
- \* psa\_C\_May19-22\_0805.png
- \* psa\_C\_May20-22\_0805.png
- \* psa\_C\_Nov02-20\_0911.png
- \* psa\_C\_Nov03-20\_0711.png
- \* psa\_C\_Nov04-20\_0811.png
- \* psa\_C\_Nov05-20\_0811.png

- \* psa\_C\_Nov11-24\_1011.png
- \* psa\_C\_Nov12-24\_0811.png
- \* psa\_C\_Nov13-24\_0811.png
- \* psa\_C\_Nov15-24\_0811.png
- \* psa\_C\_Nov21-18\_0811.png
- \* psa\_C\_Nov22-21\_0711.png
- \* psa\_C\_Nov24-21\_0711.png
- \* psa\_C\_Nov25-19\_0911.png
- \* psa\_C\_Nov25-21\_0711.png
- \* psa\_C\_Nov26-19\_0811.png
- \* psa\_C\_Nov26-21\_0711.png
- \* psa\_C\_Nov27-19\_0811.png
- \* psa\_C\_Oct03-23\_0810.png
- \* psa\_C\_Oct04-23\_0710.png
- \* psa\_C\_Oct05-23\_0810.png
- \* psa\_C\_Oct06-23\_0810.png
- \* psa\_C\_Sep05-22\_0809.png
- \* psa\_C\_Sep06-22\_0809.png
- \* psa\_C\_Sep07-22\_0809.png
- \* psa\_C\_Sep08-22\_0809.png
- \* psa\_C\_Sep09-22\_0809.png

The copyright of individual parts of the supplement might differ from the article licence.
